# Supplementary material
Source: PubMed Central journal article supplement (PMC3265348)
Supplement: CJN.05440611_CJN05440611SupplementaryData.pdf [file CJN.05440611_CJN05440611SupplementaryData.pdf]

# **Dialysate Sodium Concentration and the Association with Interdialytic Weight Gain, Hospitalization, and Mortality**

Manfred Hecking, Angelo Karaboyas, Rajiv Saran, Ananda Sen, Masaaki Inaba, Hugh Rayner, Walter Hörl, Ronald Pisoni, Bruce Robinson, Gere Sunder-Plassmann, Friedrich Port

## **Legends for Supplementary Figures**

**Supplementary Figure 1:** Adjusted all-cause mortality risk by dialysate sodium (DNa) and predialysis serum sodium (SNa).

Cox model, as in Figure 3, but additionally adjusted for interdialytic weight gain (IDWG) and predialysis systolic blood pressure (SBP).

**Supplementary Figure 2:** Adjusted hospitalization risk by dialysate sodium (DNa) and predialysis serum sodium (SNa).

Cox model, as in Figure 4, but additionally adjusted for interdialytic weight gain (IDWG) and predialysis systolic blood pressure (SBP).

# All-cause mortality Hazard Ratio (95% CI)

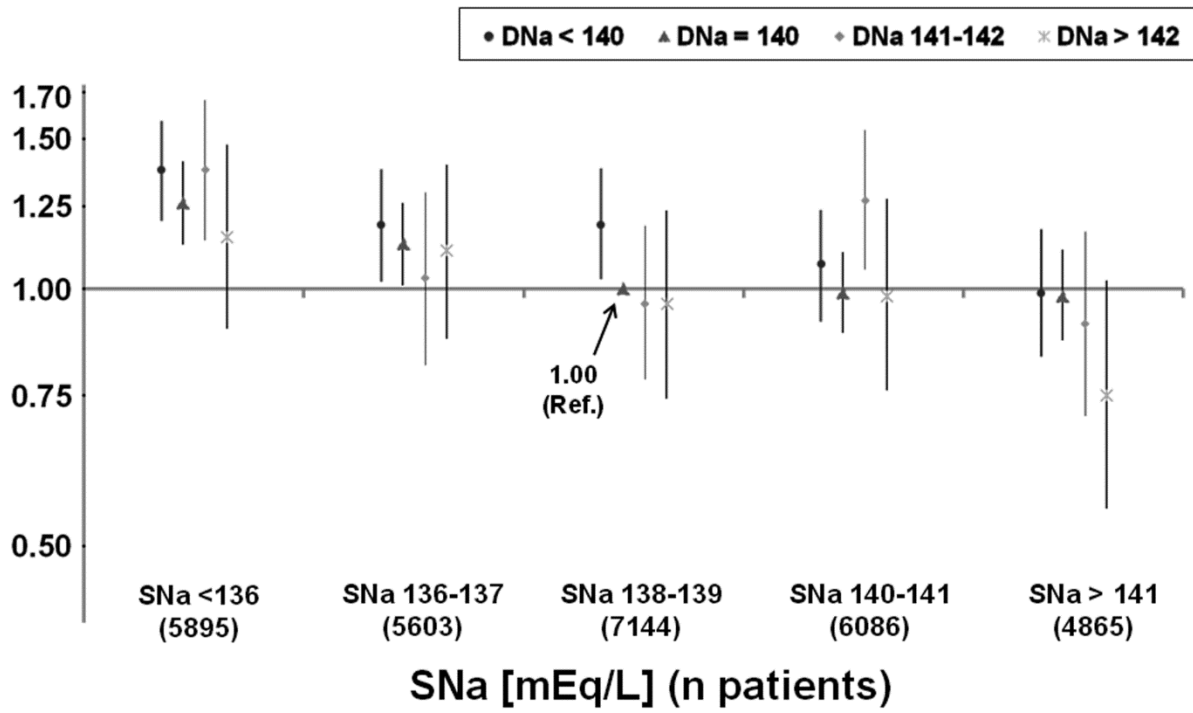

Suppl. Fig. 1

Model additionally adjusted for IDWG and predialysis SBP

**Hospitalizations\***  
**Hazard Ratio (95% CI)**

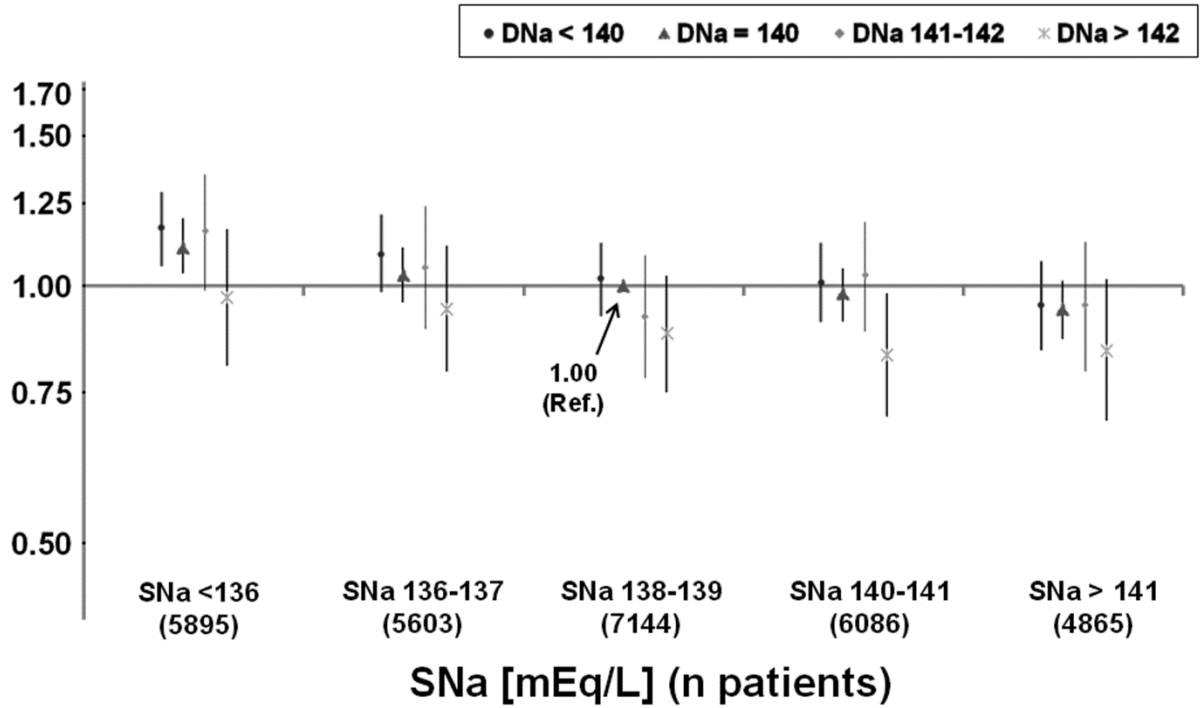

**Suppl. Fig. 2**

Model additionally adjusted for IDWG and predialysis SBP
